# Supplementary material for: Cloning and Characterization of Fructose-1,6-Bisphosphate Aldolase from Euphausia superba
Source: MDPI journal article supplement (doi:10.3390/ijms231810478), 2022-09-09
Supplement: s1 [file s1]

**Table S1.** Primer sequences

| Primer     | Sequence(5'-3')                          |
|------------|------------------------------------------|
| 3C-EsFBA-F | atggatgaactgtataaattggaggtttgtccagggtc   |
| EsFBA-R    | gtggtggtggtgctcgagtgcgtagtctggcacgtcgt   |
| sfGFP-F    | aaggagatataccatggtgagcaagggcgagga        |
| SfGFP-3C-R | ctggaacaaaacctccaattatacagttcatccatgccca |

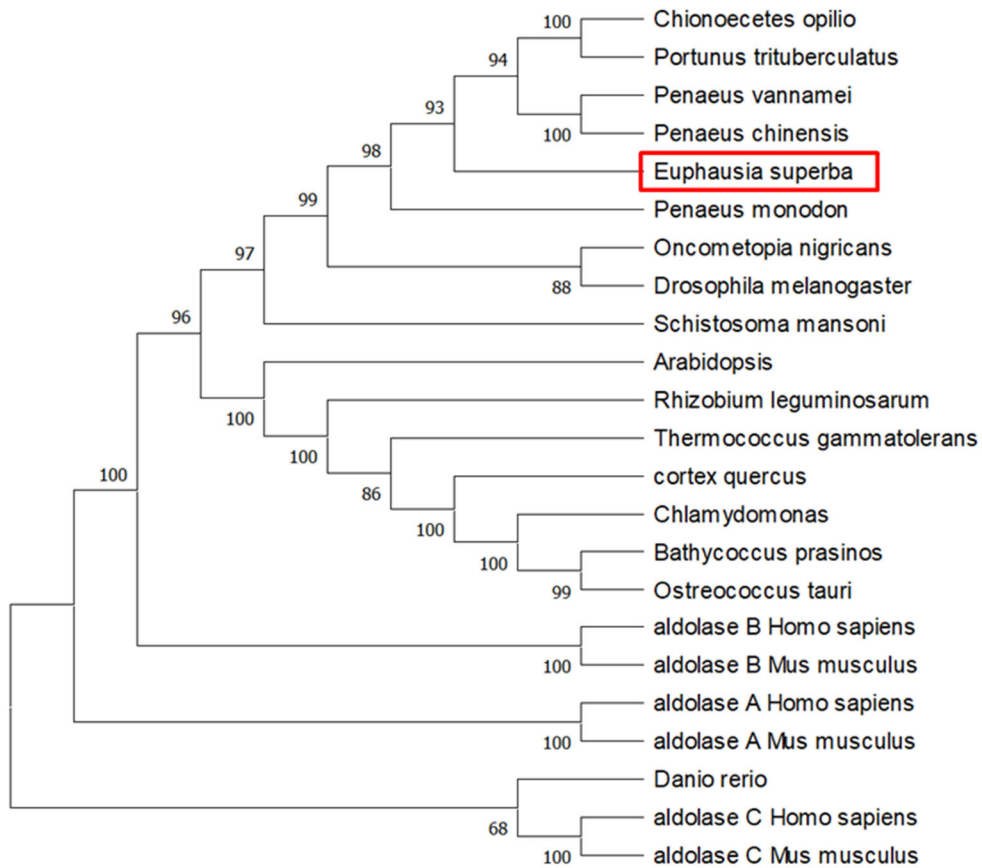**Figure S1.** The phylogenetic tree constructed according to the sequences of EsFBA and other FBA.

EsFBA researched in this study is in red box.

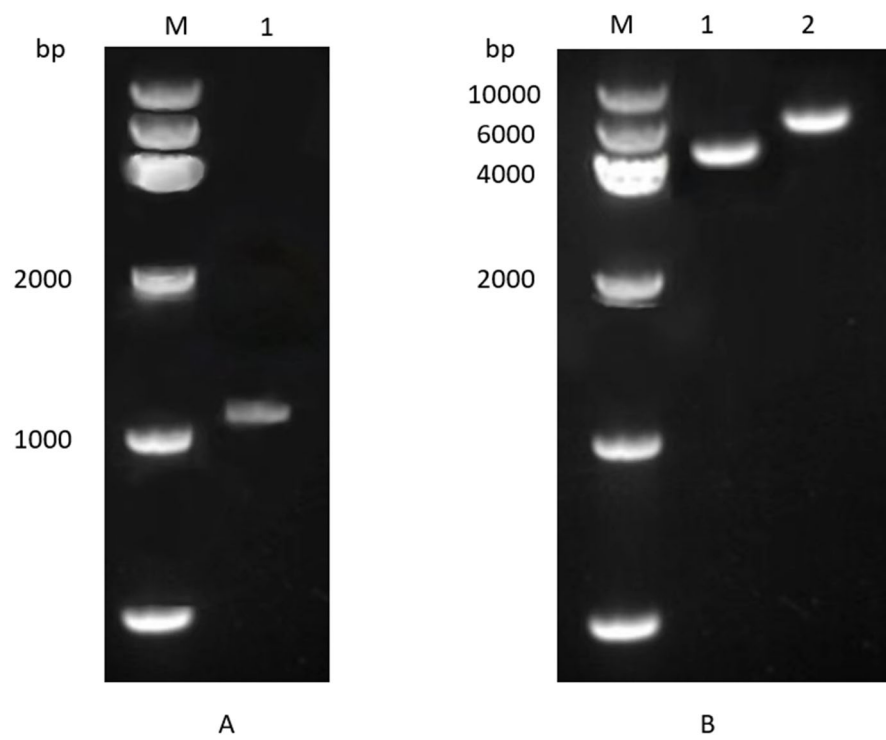

**Figure S2.** Agarose gels for testing recombinant expression vector constructs

A: M: marker; 1: PCR amplification product

B: M: marker; 1: Plasmid pET-28a; 2: Positive clone of pET-28a and target fragment.

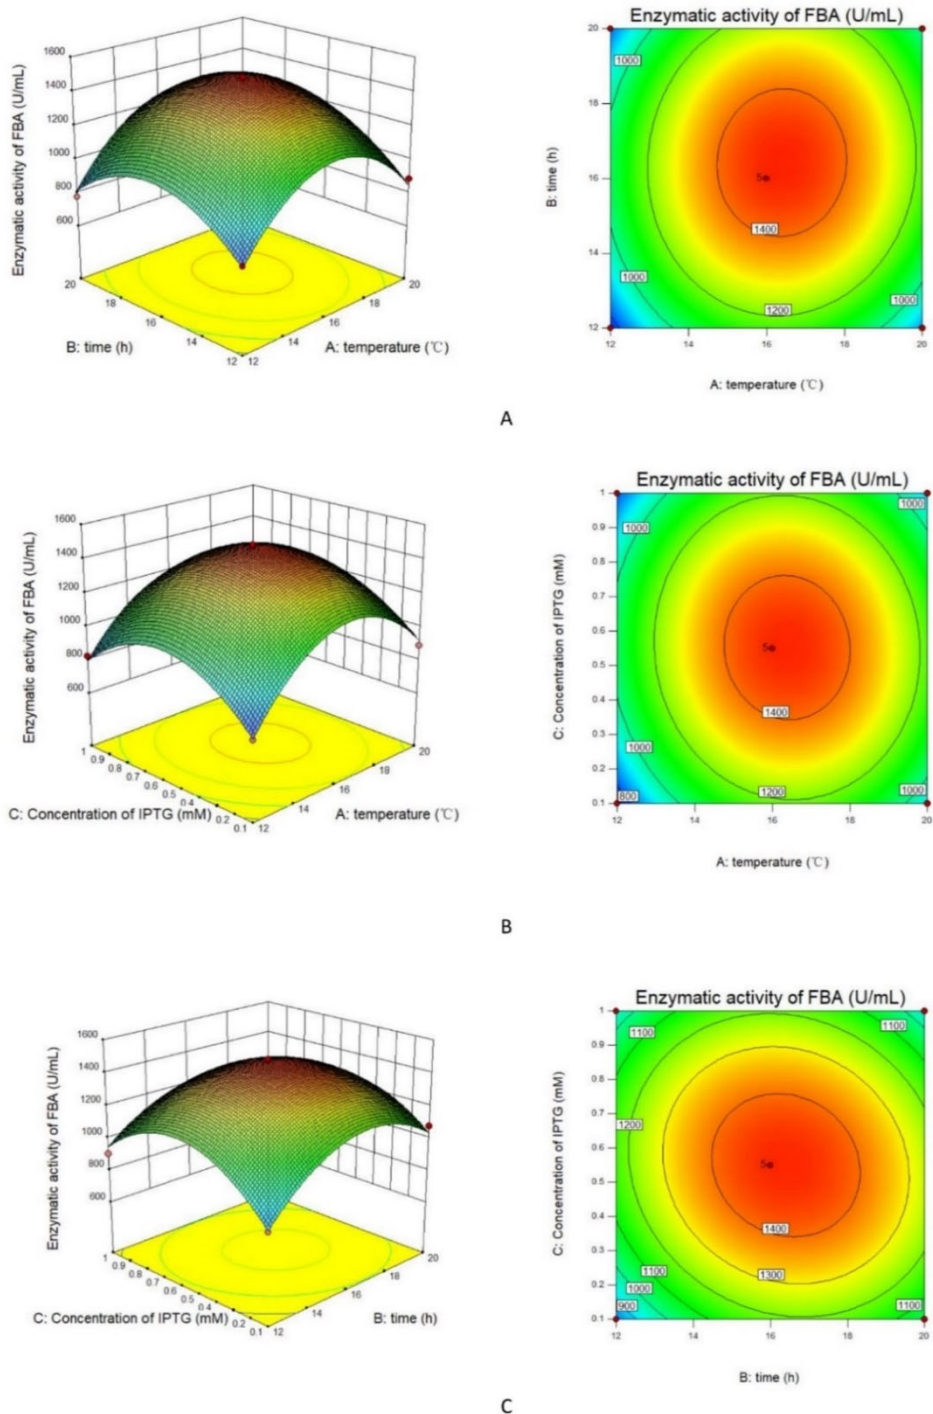

**Figure S3.** Response surface diagram and contour surface diagram of the interaction between factors on EsFBA enzyme activity.

A: Response surface relationship between temperature and time; B: Response surface relationship between temperature and IPTG concentration; C: Response surface relationship between time and IPTG concentration.
